# Supplementary material for: Manumycin A corrects aberrant splicing of Clcn1 in myotonic dystrophy type 1 (DM1) mice
Source: PubMed Central journal article supplement — Sci Rep. 2013 Jul 5;3:2142. doi: 10.1038/srep02142 (PMC3701899; doi:10.1038/srep02142), 2013-07-05
Supplement: srep02142-s1.pdf [file srep02142-s1.pdf]

Supplementary Information:

## **Manumycin A corrects aberrant splicing of *Clcn1* in myotonic dystrophy type 1 (DM1) mice**

Kosuke Oana<sup>1</sup>, Yoko Oma<sup>1</sup>, Satoshi Suo<sup>1</sup>, Masanori P. Takahashi<sup>2</sup>, Ichizo Nishino<sup>3</sup>,  
Shin'ichi Takeda<sup>4</sup>, Shoichi Ishiura<sup>1\*</sup>

1. Department of Life Sciences, Graduate School of Arts and Sciences, The University of Tokyo, Komaba, Tokyo, Japan. 2. Department of Neurology, Osaka University Graduate School of Medicine, Suita, Osaka, Japan. 3. Department of Neuromuscular Research, National Institute of Neuroscience, National Center of Neurology and Psychiatry, Kodaira, Tokyo, Japan. 4. Department of Molecular Therapy, National Institute of Neuroscience, National Center of Neurology and Psychiatry, Kodaira, Tokyo, Japan.

\*Corresponding author: Shoichi Ishiura, Department of Life Sciences, Graduate School of Arts and Sciences, The University of Tokyo, 3-8-1, Komaba, Muguro-ku, Tokyo 153-8902, Japan. E-mail: [cishiura@mail.ecc.u-tokyo.ac.jp](mailto:cishiura@mail.ecc.u-tokyo.ac.jp) Tel/Fax: +81-3-5454-6739

### CONTENTS

Supplementary Materials and Methods

Supplementary Figure Legends

Supplementary Figures S1-S8

Supplementary Table S1-S2

## **Supplementary Materials and Methods**

### ***Western blotting for MBNL1 and CUGBP1***

#### *Sample preparation*

C2C12 cells were cultured with DMSO or manumycin A (20 $\mu$ M). After drug treatment for 24 h, the cells were harvested in PBS containing 1% Triton X-100 and 0.1% protease inhibitor cocktail (Sigma-Aldrich, St. Louis, MO, USA) and then sonicated on ice for 10 s. The lysate was centrifuged for 30 min at 13,000 rpm at 4°C to remove cellular debris. The protein concentration of the solubilized material was determined by DC protein assay (BioRad, Hercules, CA, USA). After addition of 2 $\times$  protein sample buffer containing 0.1 M Tris-HCl (pH 6.8), 4% SDS, 20% glycerol, 0.2% bromophenol blue, and 8.3% 2-mercaptoethanol, samples were boiled for 5 min.

#### *Antibodies*

Mouse anti-MBNL1 (1:500; 3A4-1E9, Sigma-Aldrich), mouse anti-CUGBP1 (1:500; 3B1, MBL, Nagoya, Japan) and rabbit anti-actin (1:500; A2066, Sigma-Aldrich) were diluted in TBST (50 mM Tris-HCl (pH7.4), 150 mM NaCl, 0.1% Tween 20) containing 5% skim milk and used as a primary antibodies. HRP-linked anti-mouse IgG (1:10,000; #7074, Cell Signaling, Beverly, MA, USA) or HRP-linked anti-rat IgG (1:10,000; #7077, Cell Signaling) was diluted in TBST and used as the secondary antibody.

#### *Western blotting*

Samples (25 $\mu$ g) were separated by SDS-PAGE and transferred to PVDF membranes (Immobilon-P, Millipore, Bedford, MA, USA). The membranes were blocked with 5% skim milk in TBST buffer for 1 h at room temperature and then incubated with the each primary antibody solution overnight at 4°C. Next the membranes were incubated with an HRP-

conjugated secondary antibody solution for 30 min at room temperature. Before and after incubation of each antibody, membranes were washed five times for 5 min with TBST. The immunoreactive bands were visualized using ECL Prime reagent (GE Healthcare, Buckinghamshire, UK). Images of protein bands were captured using a LAS-3000 imager (FUJIFILM, Tokyo, Japan) and analyzed using Multigauge ver 2.3 software (FUJIFILM).

For Western blotting of CUGBP1, membranes used for MBNL1 analysis were stripped by incubation with 0.2 M glycine solution (pH2.8) for 30 min at room temperature. Similarly, membranes used for CUGBP1 analysis were stripped again for Western blotting of actin.

### ***RNA interference***

#### ***K-Ras and N-Ras target sequences***

Small interfering RNAs (siRNAs) specific for K-Ras (K-Ras siRNA) and N-Ras (N-Ras siRNA) were purchased from Sigma-Aldrich. The H-Ras siRNA and negative control siRNA were the same as those described in the main article. The siRNA target sequences were as follows: mouse K-Ras siRNA sense, 5'-GAAACCUGUCUCUUGGAUAdTdT-3'; mouse K-Ras siRNA antisense, 5'-UAUCCAAGAGACAGGUUUCdTdT-3'; mouse N-Ras siRNA sense, 5'-GAGAUACGCCAGUACCGAAAdTdT-3'; mouse N-Ras siRNA antisense, 5'-UUCGGUACUGGCGUAUCUCdTdT-3'.

### ***Cell survival assay***

Cell survival was determined by assaying viable cells using the Cell Counting Kit-8 (Dojindo Molecular Technologies, Kumamoto, Japan) according to manufacture's protocol. Culture, transfection, chemical compounds treatment (0.1% v/v for 24h) were the same as those described in the main article. After small-molecule treatment for 24h, cell viability

was assayed. The absorbance was measured photometrically at 450nm with a reference wavelength at 650nm.

## Supplementary Figure Legends

### Supplementary Figure S1

Top 10 compounds that showed the highest luciferase activity in screening. Bars represent the mean + SEM (n=3).

### Supplementary Figure S2

Percentages of viable cells after small-molecule treatment. Percentages of viable cells relative to DMSO treatment are presented (mean + SEM, n=3).

### Supplementary Figure S3

Manumycin A corrects aberrant splicing of *Clcn1* in a dose-dependent manner (10, 20, and 40  $\mu$ M) in the presence of the expanded CUG repeat. (a) Cellular splicing assays showed that manumycin A dose-dependently corrects *Clcn1* splicing. (b) Bar charts show the quantified percentages of exon 7A inclusion (mean + SEM, n=3). The gel image was cropped around the region of interest and the samples (n=3) were resolved in the same gel. Statistical significance was determined using Tukey's multiple comparison tests (\*\*p<0.01, \*\*\*p<0.001).

### Supplementary Figure S4

Effect of manumycin A injection on the alternative splicing of other genes. (a) Results of RT-PCR analysis of *Serca1*, m-Titin and *Gapdh* transcripts. (b,c) Quantitative data for the splicing analysis shown in (a) (mean + SEM, n=3). The gel image was cropped around the region of interest and the samples (n=3) were resolved in the same gel. There were no significant differences between vehicle and manumycin A injection, as determined using *t*-tests.

### Supplementary Figure S5

Effect of Ras siRNAs on the splicing of *Clcn1*. (a) Results of cellular splicing assay using the *Clcn1*-L minigene, DM480 and siRNA. (b) Quantification of results shown in (a) (mean + SEM, n=3). The gel image was cropped around the region of interest and the samples (n=3) were resolved in the same gel. Statistical significance was determined using Dunnett's multiple comparison tests (\*p<0.05, \*\*p<0.01).

### Supplementary Figure S6

Effect of the expanded CUG repeat on H-Ras expression. (a) Results of Western Blot analysis of H-Ras and actin in DM18- or DM480-transfected C2C12 cells. (b) Quantification of the Western blotting shown in (a) (mean + SEM, n=3). The blot image was cropped around the region of interest and the samples (n=3) were resolved in the same gel. There were no significant differences between DM18- and DM480-transfected cells, as determined using *t*-tests.

### Supplementary Figure S7

Manumycin A treatment did not alter the expression levels of MBNL1 and CUGBP1 in C2C12 cells. (a) Results of Western blot analysis of MBNL1, CUGBP1 and actin in DMSO - or manumycin A-treated cells. (b, c) Quantification of the Western blotting shown in (a) (mean + SEM, n=3). The blot image was cropped around the region of interest and the samples (n=3) were resolved in the same gel. There were no significant differences between DMSO and manumycin A treatment, as determined using *t*-tests.

### Supplementary Figure S8

Effect of manumycin A on *Cln1* splicing in the absence of DM480. (a) Results of Cellular splicing analysis. (b) Bar chart shows the quantified percentage of exon 7A inclusion (mean + SEM, n=3). The gel image was cropped around the region of interest and the samples (n=3) were resolved in the same gel. Statistical significance was determined using *t*-tests ( $p^* < 0.05$ ).

## Supplementary Figure S1

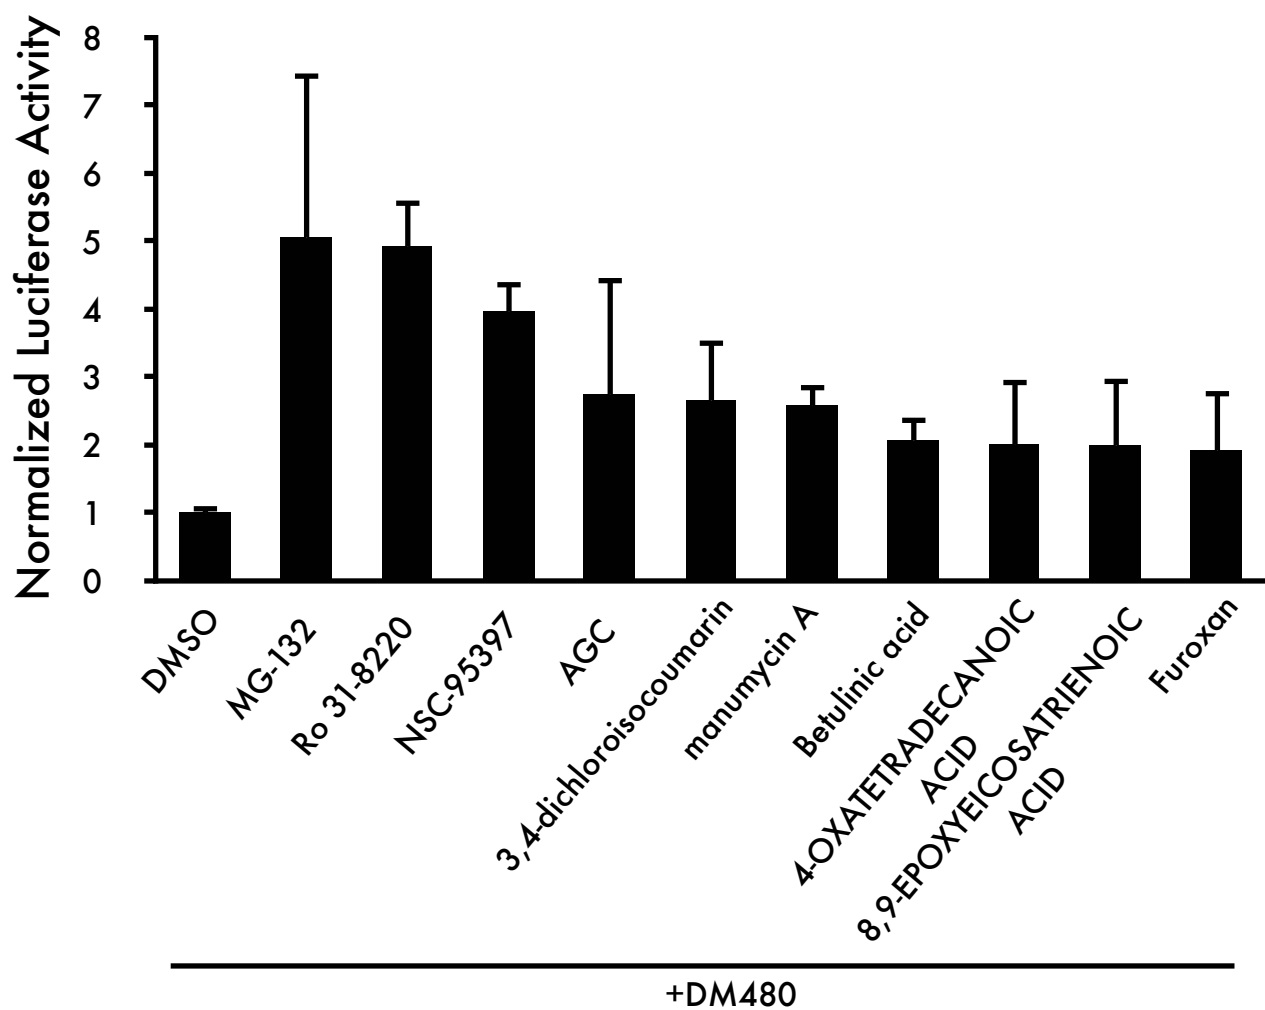



## Supplementary Figure S2

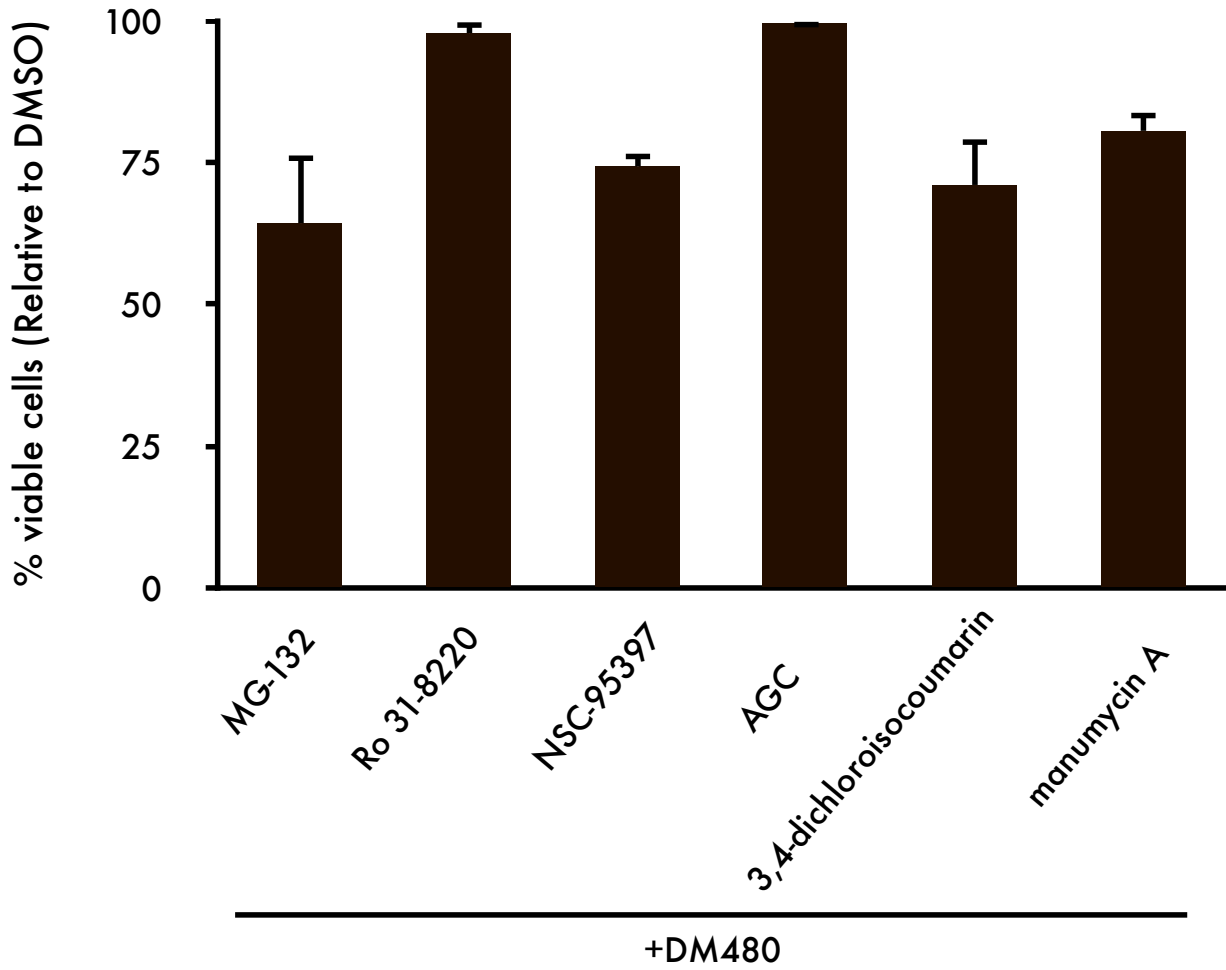

# Supplementary Figure S3

**a**

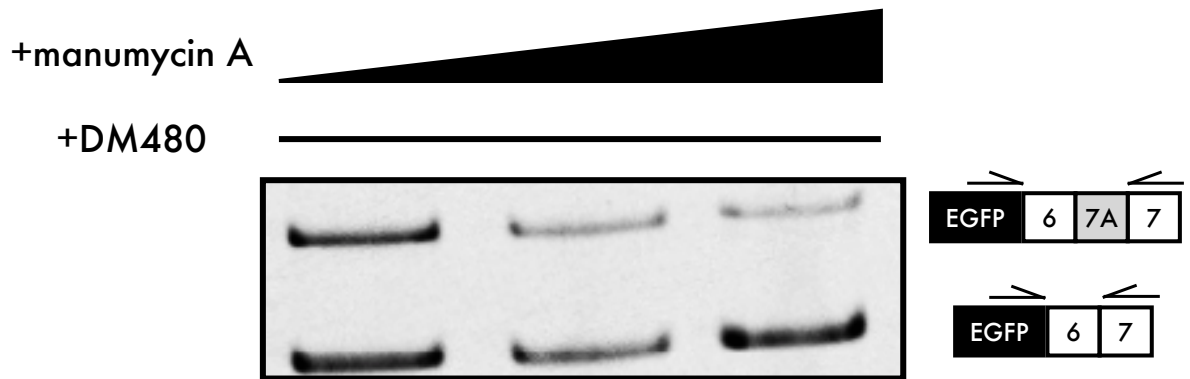

**b**

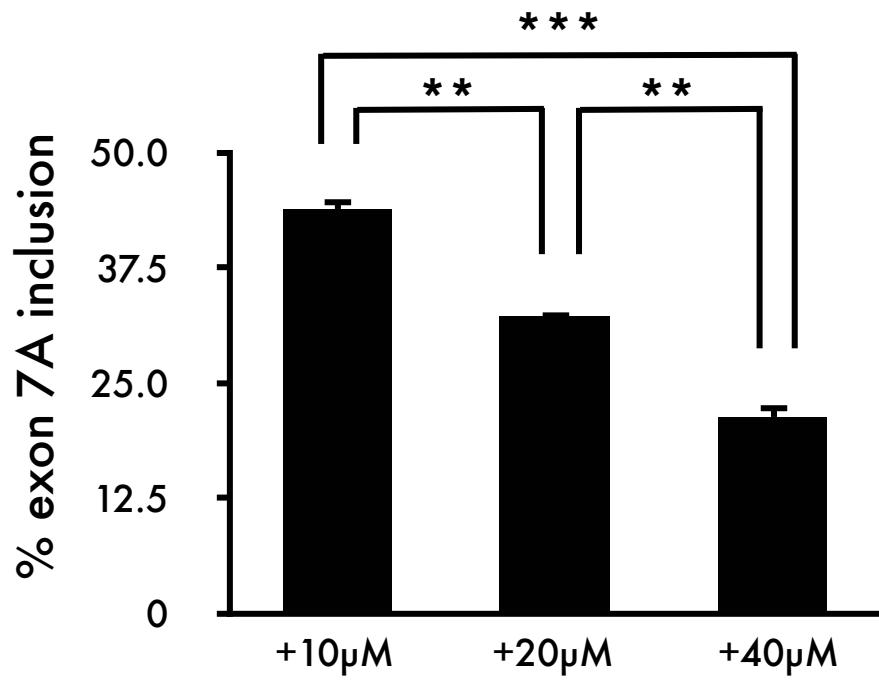

## Supplementary Figure S4

**a**

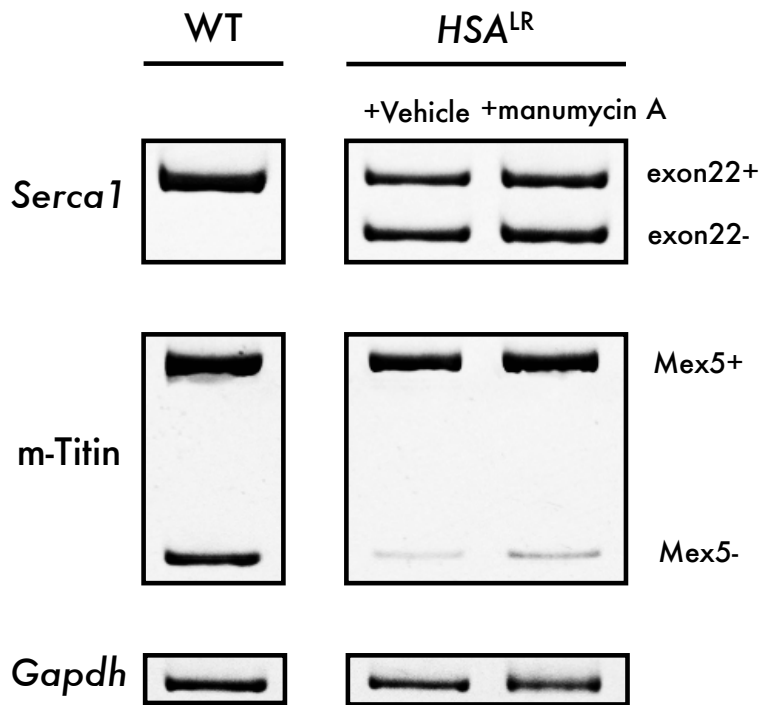

**b**

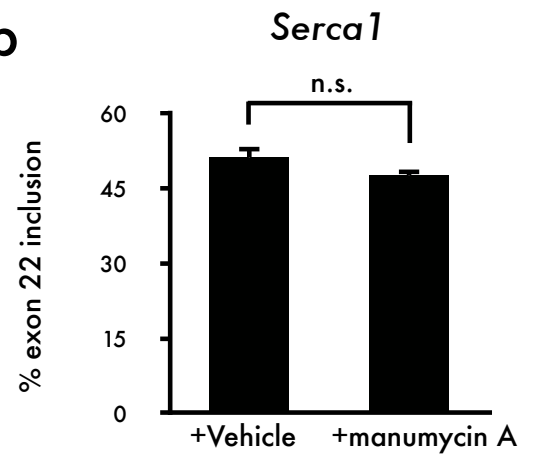

**c**

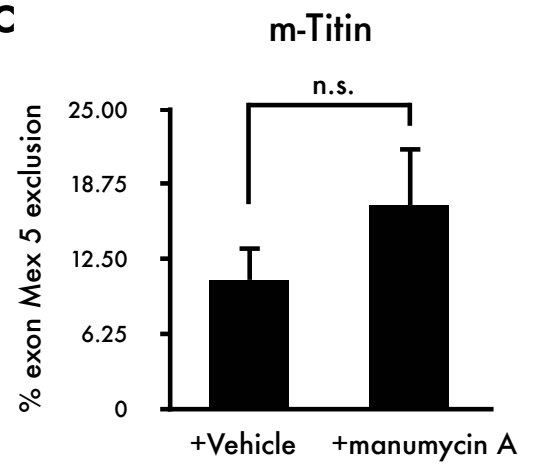

# Supplementary Figure S5

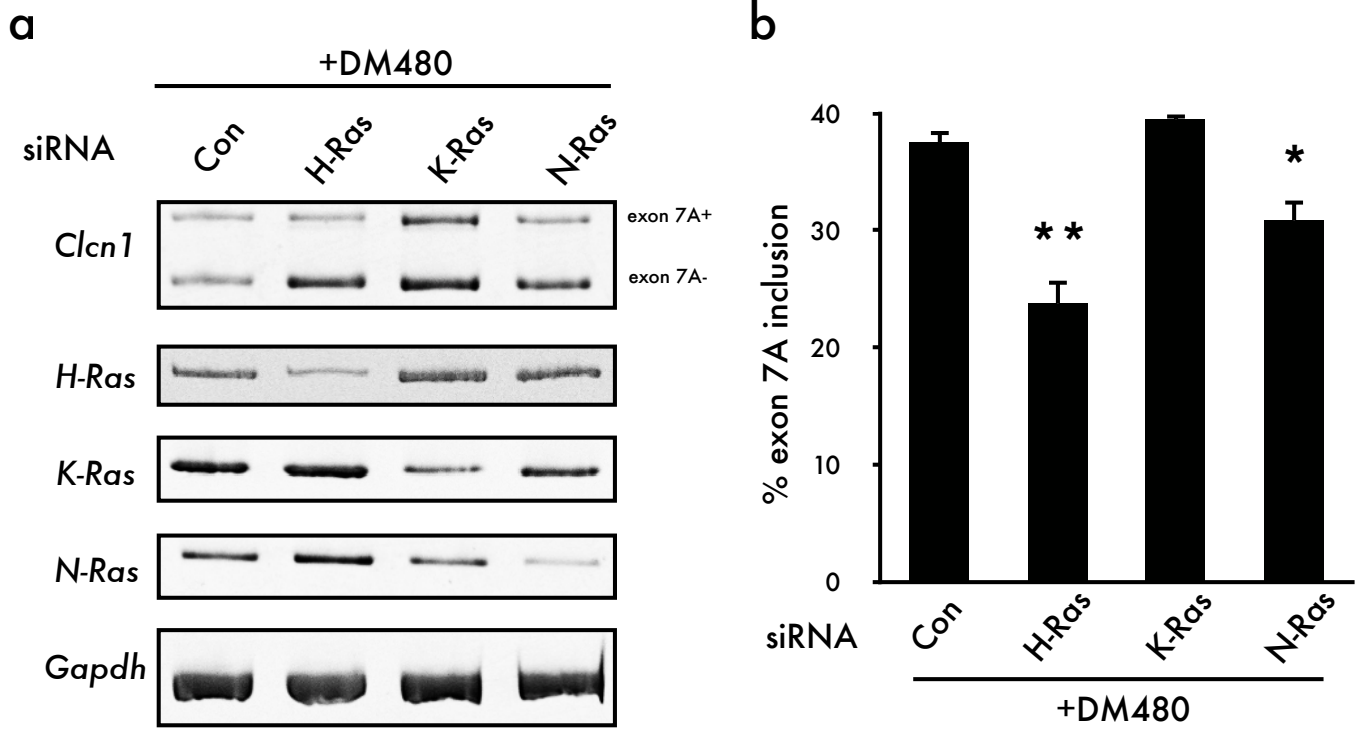

## Supplementary Figure S6

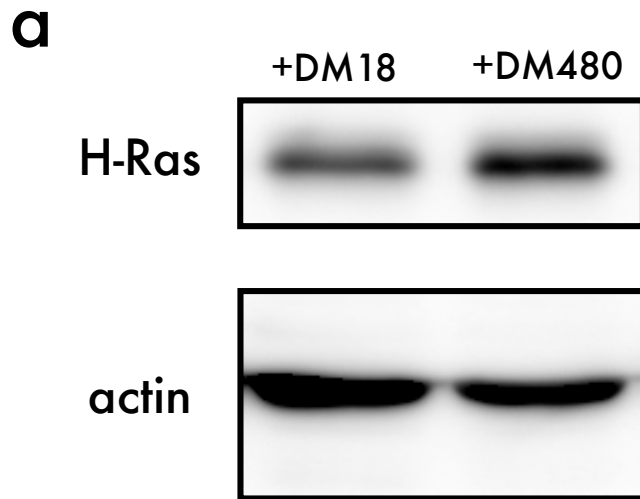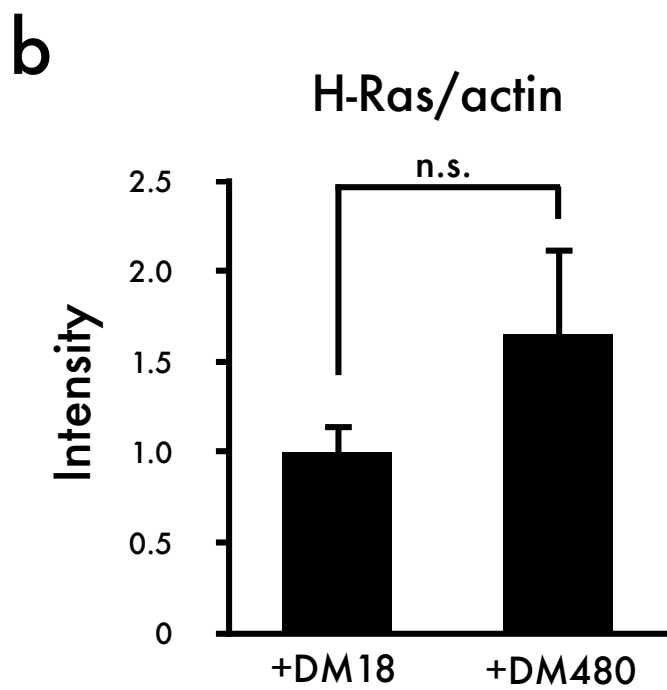

# Supplementary Figure S7

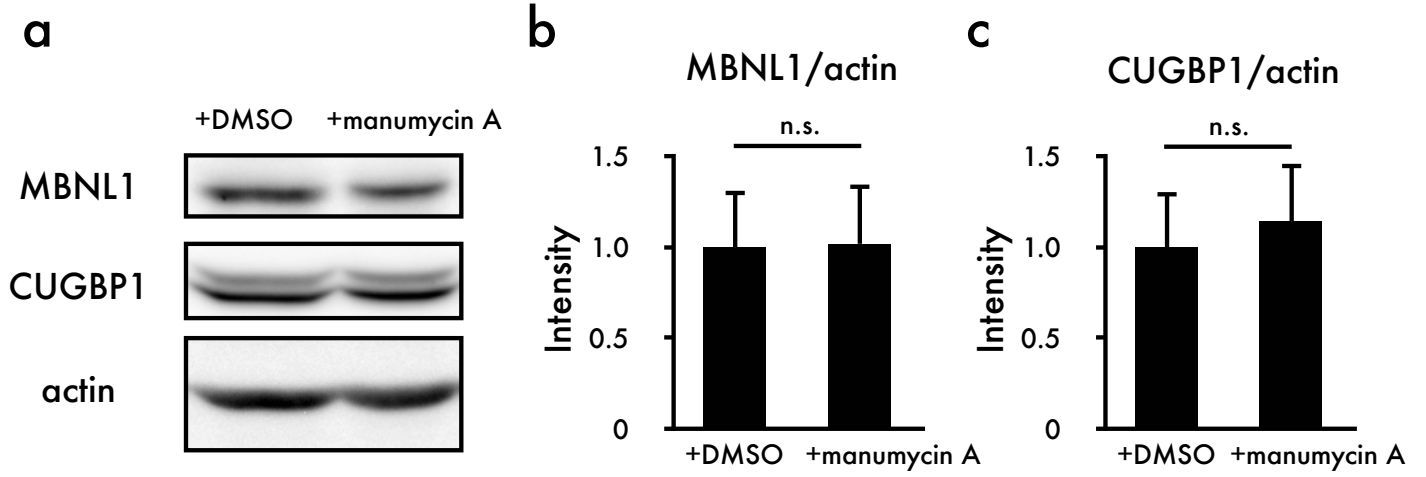

## Supplementary Figure S8

**a**

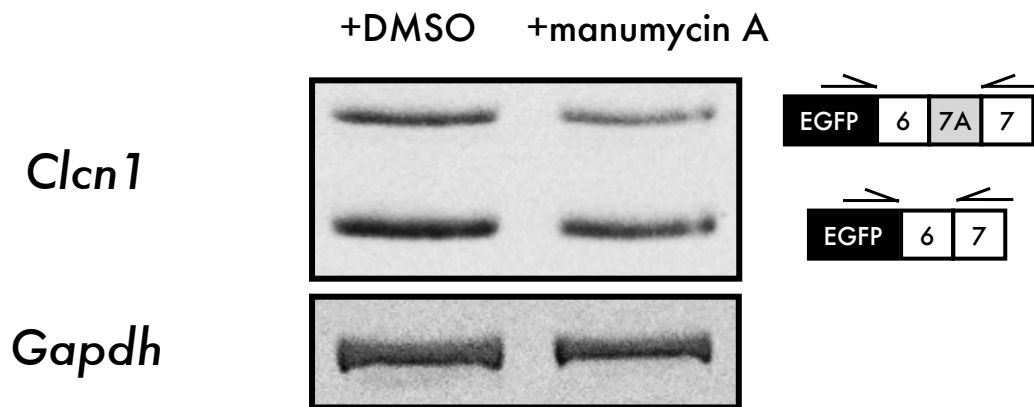

**b**

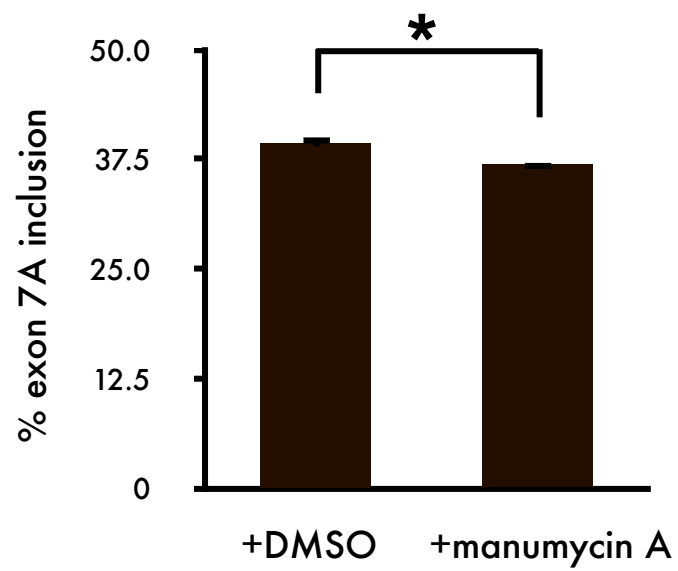

**Supplementary Table S1. Results of screening of ~400 chemical compounds**

|                                  |                               |                                                 |         | 0.1% (v/v)      | MEAN (n=3) | SEM  |
|----------------------------------|-------------------------------|-------------------------------------------------|---------|-----------------|------------|------|
| DMSO                             |                               |                                                 |         |                 | 1.00       | 0.10 |
|                                  |                               |                                                 |         |                 |            |      |
| NAME                             | Classification of bioactivity | Action                                          | Solvent | Final CONC.(µM) | MEAN (n=3) | SEM  |
| MG-132                           | Protease inhibitors           | Proteasome inhibitor                            | DMSO    | 11              | 5.06       | 2.42 |
| Ro 31-8220                       | Kinase inhibitors             | PKC inhibitor                                   | DMSO    | 9               | 4.93       | 0.69 |
| NSC-95397                        | Inhibitors                    | CDC25 phosphatase inhibitor                     | DMSO    | 16              | 3.96       | 0.46 |
| AGC                              | Bioactive lipids              | Negative control for AGGC and AFC               | DMSO    | 1               | 2.75       | 1.73 |
| 3,4-dichloroisocoumarin          | Protease inhibitors           | Granzyme B inhibitor                            | DMSO    | 23              | 2.66       | 0.89 |
| manumycin A                      | Inhibitors                    | ras farnesylation inhibitor                     | DMSO    | 20              | 2.58       | 0.33 |
| Betulinic acid                   | Inhibitors                    | induces mitochondrial permeability pore opening | DMSO    | 11              | 2.07       | 0.35 |
| 4-OXATETRADECANOIC ACID          | Bioactive lipids              | Myristic acid analog                            | DMSO    | 1               | 2.00       | 0.97 |
| 8,9-EPOXYEICOSATRIENOIC ACID     | Bioactive lipids              | Bioactive arachidonic acid metabolite           | DMSO    | 0.1             | 1.99       | 1.01 |
| Furoxan                          | Activators                    | NO donor                                        | DMSO    | 27              | 1.92       | 0.91 |
| 1-OCTADECYL-2-METHYLGLYCERO-3 PC | Bioactive lipids              | Inhibits PI-specific PLC                        | DMSO    | 1               | 1.89       | 0.89 |
| DRB                              | Kinase inhibitors             | CKII inhibitor                                  | DMSO    | 16              | 1.84       | 0.19 |
| 15d-PROSTAGLANDIN J2             | Bioactive lipids              | Bioactive prostaglandin                         | DMSO    | 1               | 1.81       | 0.77 |
| ARACHIDONOYL-PAF                 | Bioactive lipids              | PAF precursor                                   | DMSO    | 1               | 1.79       | 0.65 |
| ionomycin                        | Ion channel ligands           | Ca++ ionophore                                  | DMSO    | 7               | 1.72       | 0.05 |
| Ala-Ala-Phe-CMK                  | Protease inhibitors           | Tripeptidyl peptidase II inhibitor              | DMSO    | 11              | 1.68       | 0.16 |
| Hinokitiol                       | Inhibitors                    | Iron chelator                                   | DMSO    | 30              | 1.62       | 0.67 |
| Tyrphostin-8                     | Inhibitors                    | Calcineurin inhibitor                           | DMSO    | 31              | 1.60       | 0.15 |
| N9-Isopropylolomoucine           | Kinase inhibitors             | CDC-2 kinase inhibitor                          | DMSO    | 15              | 1.58       | 0.20 |
| juglone                          | Inhibitors                    | PIN1 inhibitor                                  | DMSO    | 29              | 1.58       | 0.11 |
| C16 CERAMIDE                     | Bioactive lipids              | Activates PKC zeta                              | DMSO    | 1               | 1.54       | 0.54 |
| 4-HYDROXYPHENYLRETINAMIDE        | Nuclear receptor ligands      | Retinoid receptor agonist / apoptosis inducer   | DMSO    | 1               | 1.50       | 0.59 |
| H7                               | Kinase inhibitors             | kinase inhibitor                                | DMSO    | 14              | 1.49       | 0.14 |
| Tanshinone IIA                   | Inhibitors                    | AP-1 inhibitor                                  | DMSO    | 17              | 1.48       | 0.17 |
| PHENAMIL                         | Ion channel ligands           | Sodium channels                                 | DMSO    | 12              | 1.47       | 0.22 |
| Fumonisin B1                     | Lipid biosynthesis            | inhibits ceramide synthase                      | DMSO    | 7               | 1.44       | 0.21 |
| 12(S)-HPETE                      | Bioactive lipids              | Fatty acid hydroperoxide                        | DMSO    | 0.1             | 1.43       | 0.48 |
| DIMETHYLOXALOYLGLYCINE           | Inhibitors                    | Prolyl-4-hydroxylase inhibitor                  | DMSO    | 1               | 1.43       | 0.23 |
| GM6001                           | Protease inhibitors           | broad spectrum MMP inhibitor                    | DMSO    | 13              | 1.41       | 0.20 |
| Lavendustin A                    | Kinase inhibitors             | Tyrosine kinase inhibitor (EGF-R)               | DMSO    | 13              | 1.40       | 0.16 |
| PENITREM A                       | Ion channel ligands           | Potassium channels                              | DMSO    | 8               | 1.39       | 0.37 |
| bafilomycin A1                   | Inhibitors                    | vacuolar ATPase inhibitor                       | DMSO    | 1               | 1.37       | 0.14 |
| SB-415286                        | Kinase inhibitors             | GSK3 beta inhibitor                             | DMSO    | 14              | 1.36       | 0.19 |
| MCI-186                          | Inhibitors                    | antioxidant, cytoprotectant                     | DMSO    | 29              | 1.36       | 0.12 |
| FK-506                           | Inhibitors                    | FKBP ligand                                     | DMSO    | 5               | 1.34       | 0.11 |
| NIGULDIPINE                      | Ion channel ligands           | Calcium channels                                | DMSO    | 8               | 1.34       | 0.18 |
| LFM-A13                          | Kinase inhibitors             | BTK inhibitor                                   | DMSO    | 14              | 1.34       | 0.04 |
| Leupeptin                        | Protease inhibitors           | protease inhibitor                              | DMSO    | 11              | 1.34       | 0.16 |
| 5(S)-HETE                        | Bioactive lipids              | Bioactive arachidonic acid metabolite           | DMSO    | 0.1             | 1.33       | 0.37 |
| CARBACYCLIN                      | Bioactive lipids              | PPAR delta agonist                              | DMSO    | 1               | 1.33       | 0.27 |
| calphostin C                     | Kinase inhibitors             | PKC inhibitor                                   | DMSO    | 1               | 1.33       | 0.16 |
| HBDDDE                           | Kinase inhibitors             | PKC inhibitor                                   | DMSO    | 15              | 1.32       | 0.09 |
| cyclosporin A                    | Inhibitors                    | calcineurin inhibitor                           | DMSO    | 4               | 1.32       | 0.22 |
| 5,6-EPOXYEICOSATRIENOIC ACID     | Bioactive lipids              | Bioactive arachidonic acid metabolite           | DMSO    | 0.1             | 1.31       | 0.34 |
| cypermethrin                     | Inhibitors                    | calcineurin inhibitor                           | DMSO    | 12              | 1.31       | 0.13 |
| HA1077                           | Kinase inhibitors             | inhibitor of Rho-dependent kinases              | DMSO    | 14              | 1.31       | 0.16 |
| PIMOZIDE                         | Ion channel ligands           | Calcium channels                                | DMSO    | 11              | 1.30       | 0.28 |
| NIFLUMIC ACID                    | Ion channel ligands           | Misc. channels                                  | DMSO    | 18              | 1.30       | 0.21 |
| 9,10-OCTADECENOAMIDE             | Endocannabinoids              | Endogenous sleep inducing lipid                 | DMSO    | 1               | 1.30       | 0.25 |
| Histamine                        | CNS receptor ligands          | Histamine receptor agonist                      | DMSO    | 45              | 1.29       | 0.11 |
| YS035                            | Ion channel ligands           | Calcium channels                                | DMSO    | 13              | 1.29       | 0.21 |



|                                                     |                          |                                                   |      |     |      |      |
|-----------------------------------------------------|--------------------------|---------------------------------------------------|------|-----|------|------|
| Indomethacin                                        | Lipid biosynthesis       | cyclooxygenase inhibitor                          | DMSO | 14  | 1.29 | 0.16 |
| QX-314                                              | Ion channel ligands      | Sodium channels                                   | DMSO | 15  | 1.28 | 0.24 |
| aristolochic acid                                   | Lipid biosynthesis       | phospholipase A2 inhibitor                        | DMSO | 15  | 1.27 | 0.21 |
| 1400W                                               | Inhibitors               | iNOS inhibitor                                    | DMSO | 20  | 1.27 | 0.16 |
| CLOPROSTENOL Na                                     | Bioactive lipids         | Prostaglandin FP receptor agonist                 | DMSO | 1   | 1.27 | 0.25 |
| Curcumin                                            | Inhibitors               | NFkappaB inhibitor                                | DMSO | 14  | 1.26 | 0.15 |
| PRIMA-1                                             | Inhibitors               | p53 reactivator                                   | DMSO | 27  | 1.26 | 0.16 |
| Amino-1,8-naphthalimide [4-Amino-1,8-naphthalimide] | Inhibitors               | PARP inhibitor                                    | DMSO | 24  | 1.25 | 0.22 |
| clozapine                                           | CNS receptor ligands     | Dopamine antagonist                               | DMSO | 15  | 1.25 | 0.23 |
| 1,2-DIOLEOYL-GLYCEROL (18:1)                        | Bioactive lipids         | Activates PKC                                     | DMSO | 1   | 1.24 | 0.31 |
| SKF-96365                                           | Ion channel ligands      | Calcium channels                                  | DMSO | 12  | 1.24 | 0.26 |
| bumetanide                                          | Inhibitors               | Na+K+Cl- cotransport inhibitor                    | DMSO | 14  | 1.24 | 0.13 |
| GW-5074                                             | Kinase inhibitors        | cRAF1 kinase inhibitor                            | DMSO | 10  | 1.24 | 0.03 |
| QUININE                                             | Ion channel ligands      | Potassium channels                                | DMSO | 15  | 1.23 | 0.20 |
| damnacanthal                                        | Kinase inhibitors        | p56lck inhibitor                                  | DMSO | 18  | 1.23 | 0.17 |
| BAY 11-7082                                         | Inhibitors               | Inhibits IKK kinase activation                    | DMSO | 24  | 1.23 | 0.14 |
| Bestatin                                            | Protease inhibitors      | Aminopeptidase inhibitor                          | DMSO | 16  | 1.22 | 0.16 |
| CGP-37157                                           | Inhibitors               | inhibitor of mitochondrial Na+Ca+2 exchange       | DMSO | 15  | 1.22 | 0.14 |
| NPPB                                                | Ion channel ligands      | Misc. channels                                    | DMSO | 17  | 1.22 | 0.16 |
| 5(S)-HPETE                                          | Bioactive lipids         | Fatty acid hydroperoxide                          | DMSO | 0.1 | 1.22 | 0.29 |
| MnTBAP                                              | Inhibitors               | SOD mimetic                                       | DMSO | 6   | 1.22 | 0.08 |
| Monastrol                                           | Inhibitors               | Eg5 inhibitor                                     | DMSO | 17  | 1.21 | 0.08 |
| HA-1004                                             | Kinase inhibitors        | kinase inhibitor                                  | DMSO | 14  | 1.21 | 0.08 |
| 5-KETOICOSATETRAENOIC ACID                          | Bioactive lipids         | 5-KETE receptor (R527) agonist                    | DMSO | 0.1 | 1.21 | 0.19 |
| AG-879                                              | Kinase inhibitors        | NGF receptor inhibitor                            | DMSO | 16  | 1.21 | 0.24 |
| Aminobenzamide (3-ABA) [3-aminobenzamide (3-ABA)]   | Inhibitors               | ADP ribose polymerase, apoptosis inhibitor        | DMSO | 37  | 1.21 | 0.17 |
| NIFEDIPINE                                          | Ion channel ligands      | Calcium channels                                  | DMSO | 14  | 1.21 | 0.27 |
| AG-1296                                             | Kinase inhibitors        | c-kit, FGF and PDGF kinase inhibitor              | DMSO | 19  | 1.20 | 0.16 |
| ARACHIDONAMIDE                                      | Endocannabinoids         | Bioactive arachidonic acid metabolite             | DMSO | 1   | 1.20 | 0.29 |
| Decylubiquinone                                     | Inhibitors               | inhibits mitochondrial permeability pore opening  | DMSO | 16  | 1.19 | 0.10 |
| RYANODINE                                           | Ion channel ligands      | Intracellular calcium                             | DMSO | 10  | 1.19 | 0.15 |
| 1-HEXADECYL-2-METHYLGLYCERO-3 PC                    | Bioactive lipids         | PAF receptor agonist                              | DMSO | 1   | 1.19 | 0.35 |
| E6 berbamine                                        | Inhibitors               | calmodulin inhibitor                              | DMSO | 7   | 1.19 | 0.06 |
| AG-370                                              | Kinase inhibitors        | PDGF receptor kinase inhibitor                    | DMSO | 19  | 1.19 | 0.15 |
| U-37883A                                            | Ion channel ligands      | Potassium channels                                | DMSO | 13  | 1.19 | 0.11 |
| THAPSIGARGIN                                        | Ion channel ligands      | Intracellular calcium                             | DMSO | 8   | 1.19 | 0.09 |
| Gliotoxin                                           | Protease inhibitors      | Inhibitor of 20S-proteasome chymotrypsin activity | DMSO | 15  | 1.19 | 0.10 |
| BAPTA-AM                                            | Inhibitors               | cell permeable Ca++ chelator                      | DMSO | 7   | 1.19 | 0.16 |
| 14,15-EPOXYEICOSATRIENOIC ACID                      | Bioactive lipids         | Bioactive arachidonic acid metabolite             | DMSO | 0.1 | 1.18 | 0.27 |
| ML9                                                 | Kinase inhibitors        | kinase inhibitor                                  | DMSO | 14  | 1.18 | 0.11 |
| IB-MECA                                             | CNS receptor ligands     | Adenosine receptor agonist                        | DMSO | 10  | 1.18 | 0.24 |
| 12(S)-HETE                                          | Bioactive lipids         | Bioactive arachidonic acid metabolite             | DMSO | 0.1 | 1.18 | 0.25 |
| PHENTOLAMINE                                        | Ion channel ligands      | Potassium channels                                | DMSO | 18  | 1.18 | 0.14 |
| C2 CERAMIDE                                         | Bioactive lipids         | Apoptosis inducer                                 | DMSO | 1   | 1.17 | 0.16 |
| AG213 (Tyrphostin 47)                               | Kinase inhibitors        | EGF-R tyrosine kinase inhibitor                   | DMSO | 23  | 1.17 | 0.18 |
| BENZAMIL                                            | Ion channel ligands      | Calcium channels                                  | DMSO | 14  | 1.17 | 0.16 |
| 12-METHOXYDODECANOIC ACID                           | Bioactive lipids         | Myristic acid analog                              | DMSO | 1   | 1.17 | 0.23 |
| Triptolide                                          | Inhibitors               | inhibits NFkappaB transcriptional activation      | DMSO | 14  | 1.17 | 0.15 |
| mastoparan                                          | Activators               | activates heterotrimeric GTPases                  | DMSO | 3   | 1.17 | 0.10 |
| 16,16-DIMETHYL-PROSTAGLANDIN E2                     | Bioactive lipids         | Prostaglandin EP receptor agonist                 | DMSO | 1   | 1.16 | 0.19 |
| Mevinolin (lovastatin)                              | Lipid biosynthesis       | Inhibitor HMG-CoA reductase                       | DMSO | 12  | 1.16 | 0.06 |
| ascomycin (FK-520)                                  | Inhibitors               | binds to FKBP inhibits calcineurin                | DMSO | 6   | 1.16 | 0.13 |
| FCCP                                                | Inhibitors               | mitochondrial uncoupler                           | DMSO | 20  | 1.16 | 0.17 |
| Bromo-7-nitroindazole [3-Bromo-7-nitroindazole]     | Inhibitors               | NO synthase inhibitor                             | DMSO | 21  | 1.15 | 0.16 |
| bezafibrate                                         | Nuclear receptor ligands | PPAR alpha agonist                                | DMSO | 14  | 1.15 | 0.11 |
| aphidicolin                                         | Inhibitors               | DNA polymerase inhibitor                          | DMSO | 15  | 1.15 | 0.21 |
| PCO-400                                             | Ion channel ligands      | Potassium channels                                | DMSO | 17  | 1.15 | 0.21 |
| castanospermine                                     | Inhibitors               | glucosidase inhibitor                             | DMSO | 26  | 1.15 | 0.12 |
| CA-074-Me                                           | Protease inhibitors      | Cathepsin B inhibitor                             | DMSO | 13  | 1.15 | 0.17 |
| VERAPAMIL                                           | Ion channel ligands      | Calcium channels                                  | DMSO | 10  | 1.15 | 0.18 |

|                                   |                          |                                                  |      |     |      |      |
|-----------------------------------|--------------------------|--------------------------------------------------|------|-----|------|------|
| 8-EPI-PROSTAGLANDIN F2a           | Bioactive lipids         | Thromboxane TP receptor agonist                  | DMSO | 1   | 1.15 | 0.30 |
| 24(S)-Hydroxycholesterol          | Nuclear receptor ligands | LXR agonist                                      | DMSO | 12  | 1.15 | 0.13 |
| PROSTAGLANDIN F1a                 | Bioactive lipids         | Prostaglandin FP receptor agonist                | DMSO | 1   | 1.15 | 0.23 |
| ADRENIC ACID (22:4, n-6)          | Bioactive lipids         | Polyunsaturated fatty acid                       | DMSO | 1   | 1.14 | 0.22 |
| methotrexate                      | CNS receptor ligands     | DHFR inhibitor                                   | DMSO | 11  | 1.14 | 0.19 |
| 11,12-EPOXYEICOSATRIENOIC ACID    | Bioactive lipids         | Bioactive arachidonic acid metabolite            | DMSO | 0.1 | 1.14 | 0.23 |
| dibutyrylcyclic GMP               | Activators               | PKA activator                                    | DMSO | 10  | 1.14 | 0.23 |
| Bromo-cGMP [8-Bromo-cGMP]         | Activators               | PKG activator                                    | DMSO | 11  | 1.14 | 0.15 |
| PHENYTOIN                         | Ion channel ligands      | Sodium channels                                  | DMSO | 20  | 1.14 | 0.18 |
| CAPE                              | Inhibitors               | Antioxidant/ NFkappa B inhibitor                 | DMSO | 18  | 1.14 | 0.32 |
| KT-5720                           | Kinase inhibitors        | PKA inhibitor                                    | DMSO | 1   | 1.14 | 0.16 |
| E-64-d                            | Protease inhibitors      | calpain/cathepsin inhibitor                      | DMSO | 15  | 1.14 | 0.14 |
| 1-HEXADECYL-2-O-METHYL-GLYCEROL   | Bioactive lipids         | Blocks DAG activation of PKC                     | DMSO | 1   | 1.14 | 0.21 |
| AGGC                              | Bioactive lipids         | ICMT inhibitor                                   | DMSO | 1   | 1.14 | 0.22 |
| HNMPA-(AM)3                       | Kinase inhibitors        | Insulin receptor TK inhibitor                    | DMSO | 11  | 1.14 | 0.04 |
| monensin                          | Ion channel ligands      | Na+ ionophore                                    | DMSO | 7   | 1.14 | 0.07 |
| 4-AMINOPYRIDINE                   | Ion channel ligands      | Potassium channels                               | DMSO | 53  | 1.13 | 0.13 |
| U-74389G                          | Inhibitors               | superoxide/free-radical inhibitor                | DMSO | 7   | 1.13 | 0.21 |
| 2-HYDROXYMYRISTIC ACID            | Bioactive lipids         | Protein myristoylation inhibitor                 | DMSO | 1   | 1.13 | 0.24 |
| GRAYANOTOXIN III                  | Ion channel ligands      | Sodium channels                                  | DMSO | 12  | 1.13 | 0.16 |
| Huperzine A [(-)-Huperzine A]     | Inhibitors               | acetylcholinesterase inhibitor                   | DMSO | 21  | 1.13 | 0.14 |
| ANANDAMIDE (22:4,n-6)             | Endocannabinoids         | Cannabinoid receptor agonist                     | DMSO | 1   | 1.13 | 0.26 |
| 1-ACYL-PAF                        | Bioactive lipids         | PAF agonist                                      | DMSO | 1   | 1.13 | 0.26 |
| 1-HEXADECYL-2-O-ACETYL-GLYCEROL   | Bioactive lipids         | Blocks DAG activation of PKC                     | DMSO | 1   | 1.13 | 0.29 |
| ICRF-193                          | Inhibitors               | topo II inhibitor that does not cause DNA breaks | DMSO | 18  | 1.13 | 0.10 |
| 5,8,11-EICOSATRIYNOIC ACID        | Bioactive lipids         | Lipoxygenase inhibitor                           | DMSO | 1   | 1.13 | 0.26 |
| H9                                | Kinase inhibitors        | kinase inhibitor                                 | DMSO | 15  | 1.13 | 0.11 |
| CIRAZOLINE                        | CNS receptor ligands     | adrenoreceptor agonist (alpha)                   | DMSO | 23  | 1.12 | 0.18 |
| ANANDAMIDE (20:4, n-6)            | Endocannabinoids         | Cannabinoid receptor agonist                     | DMSO | 1   | 1.12 | 0.36 |
| 6-KETO-PROSTAGLANDIN F1a          | Bioactive lipids         | Bioactive prostaglandin                          | DMSO | 1   | 1.12 | 0.31 |
| LIDOCAINE                         | Ion channel ligands      | Sodium channels                                  | DMSO | 21  | 1.12 | 0.20 |
| 9(S)-HPODE                        | Bioactive lipids         | Fatty acid hydroperoxide                         | DMSO | 0.1 | 1.12 | 0.17 |
| A-23187                           | Ion channel ligands      | Calcium ionophore                                | DMSO | 10  | 1.12 | 0.26 |
| 5-iodotubercidin                  | Kinase inhibitors        | ERK-2 inhibitor                                  | DMSO | 13  | 1.11 | 0.25 |
| 9(S)-HODE                         | Bioactive lipids         | Bioactive linoleic acid metabolite               | DMSO | 0.1 | 1.11 | 0.30 |
| N,N-DIMETHYLSPHINGOSINE           | Lipid biosynthesis       | Sphingosine kinase inhibitor                     | DMSO | 1   | 1.11 | 0.19 |
| PROSTAGLANDIN E1                  | Bioactive lipids         | Prostaglandin EP receptor agonist                | DMSO | 1   | 1.11 | 0.14 |
| SDZ-201106                        | Ion channel ligands      | Sodium channels                                  | DMSO | 11  | 1.11 | 0.17 |
| CLOFIBRATE                        | Nuclear receptor ligands | PPAR alpha agonist                               | DMSO | 1   | 1.11 | 0.24 |
| L-NAME                            | Inhibitors               | NO synthesis inhibitor                           | DMSO | 19  | 1.11 | 0.17 |
| FARNESYLTHIOACETIC ACID           | Bioactive lipids         | Carboxymethylation inhibitor                     | DMSO | 1   | 1.11 | 0.17 |
| MAPP, L-erythro                   | Lipid biosynthesis       | Negative control for D-erythro-MAPP              | DMSO | 1   | 1.10 | 0.09 |
| epibatidine (+/-) (danger)        | CNS receptor ligands     | nicotinic cholinergic agonist                    | DMSO | 24  | 1.10 | 0.11 |
| PROSTAGLANDIN F2a                 | Bioactive lipids         | Prostaglandin FP receptor agonist                | DMSO | 1   | 1.10 | 0.10 |
| 1,2-DIDECANOYL-GLYCEROL (10:0)    | Bioactive lipids         | Activates PKC                                    | DMSO | 1   | 1.10 | 0.17 |
| MEAD ACID (20:3 n-9)              | Bioactive lipids         | Polyunsaturated fatty acid                       | DMSO | 1   | 1.10 | 0.13 |
| Thiorphan                         | Protease inhibitors      | Neutral endopeptidase inhibitor                  | DMSO | 20  | 1.10 | 0.13 |
| TMB-8                             | Ion channel ligands      | Intracellular calcium                            | DMSO | 12  | 1.10 | 0.13 |
| BAY K-8644                        | Ion channel ligands      | Calcium channels                                 | DMSO | 14  | 1.09 | 0.14 |
| clonidine                         | CNS receptor ligands     | adrenoreceptor agonist (alpha)                   | DMSO | 22  | 1.09 | 0.07 |
| MINOXIDIL SULFATE                 | Ion channel ligands      | Potassium channels                               | DMSO | 17  | 1.09 | 0.09 |
| 13(S)-HPODE                       | Bioactive lipids         | Fatty acid hydroperoxide                         | DMSO | 0.1 | 1.09 | 0.15 |
| MISOPROSTOL, FREE ACID            | Bioactive lipids         | Prostaglandin EP receptor agonist                | DMSO | 1   | 1.09 | 0.12 |
| IBMX                              | Inhibitors               | PDE inhibitor (broad spec), adenosineR agonist   | DMSO | 23  | 1.09 | 0.07 |
| ARACHIDONIC ACID (20:4, n-6)      | Bioactive lipids         | Polyunsaturated fatty acid                       | DMSO | 1   | 1.09 | 0.19 |
| ANANDAMIDE (20:3,n-6)             | Endocannabinoids         | Cannabinoid receptor agonist                     | DMSO | 1   | 1.09 | 0.28 |
| 1-OLEOYL-2-ACETYL-GLYCEROL        | Bioactive lipids         | PKC activator                                    | DMSO | 1   | 1.09 | 0.15 |
| cytochalasin D                    | Inhibitors               | F actin capper                                   | DMSO | 10  | 1.08 | 0.14 |
| Pregnenolone 16alpha carbonitrile | Nuclear receptor ligands | PXR/SXR agonist                                  | DMSO | 15  | 1.08 | 0.19 |
| PROCAINAMIDE                      | Ion channel ligands      | Sodium channels                                  | DMSO | 21  | 1.08 | 0.17 |

|                                               |                          |                                                   |      |     |      |      |
|-----------------------------------------------|--------------------------|---------------------------------------------------|------|-----|------|------|
| 15-KETOEICOSATETRAENOIC ACID                  | Bioactive lipids         | Bioactive arachidonic acid metabolite             | DMSO | 0.1 | 1.08 | 0.17 |
| PROSTAGLANDIN D2                              | Bioactive lipids         | Prostaglandin DP receptor agonist                 | DMSO | 1   | 1.08 | 0.15 |
| 7,7-DIMETHYLEICOSADIENOIC ACID                | Bioactive lipids         | PLA2 inhibitor                                    | DMSO | 1   | 1.08 | 0.27 |
| 12(R)-HETE                                    | Bioactive lipids         | Bioactive arachidonic acid metabolite             | DMSO | 0.1 | 1.08 | 0.14 |
| Hoechst 33342 (cell permeable) (BisBenzimide) | Inhibitors               | DNA minor groove binder                           | DMSO | 9   | 1.08 | 0.12 |
| 2-FLUOROPALMITIC ACID                         | Bioactive lipids         | Protein palmitoylation inhibitor                  | DMSO | 1   | 1.07 | 0.32 |
| dipyridamole                                  | Inhibitors               | cGMP phosphodiesterase inhibitor                  | DMSO | 10  | 1.07 | 0.16 |
| 6,7-ADTN HBr                                  | CNS receptor ligands     | Dopamine agonist                                  | DMSO | 19  | 1.07 | 0.20 |
| CIGLITAZONE                                   | Nuclear receptor ligands | PPAR gamma agonist                                | DMSO | 1   | 1.07 | 0.27 |
| 24,25-DIHYDROXYVITAMIN D3                     | Nuclear receptor ligands | Vitamin D receptor ligand                         | DMSO | 1   | 1.07 | 0.19 |
| L-NASPA                                       | Bioactive lipids         | LPA agonist / antagonist                          | DMSO | 1   | 1.07 | 0.22 |
| LYSOPHOSPHATIDIC ACID                         | Bioactive lipids         | LPA receptor antagonist                           | DMSO | 1   | 1.07 | 0.18 |
| bongkreikic acid                              | Inhibitors               | ANT inhibitor                                     | DMSO | 1   | 1.07 | 0.11 |
| C8 DIHYDROCERAMIDE                            | Bioactive lipids         | Negative control for C8 ceramide                  | DMSO | 1   | 1.07 | 0.31 |
| IAA-94                                        | Ion channel ligands      | Misc. channels                                    | DMSO | 14  | 1.07 | 0.15 |
| 25-HYDROXYVITAMIN D3                          | Nuclear receptor ligands | Vitamin D receptor ligand                         | DMSO | 1   | 1.07 | 0.19 |
| CIMATEROL                                     | CNS receptor ligands     | adrenoceptor agonist (beta)                       | DMSO | 23  | 1.07 | 0.19 |
| ACONITINE                                     | Ion channel ligands      | Sodium channels                                   | DMSO | 8   | 1.07 | 0.13 |
| PAF C18                                       | Bioactive lipids         | PAF receptor agonist                              | DMSO | 1   | 1.06 | 0.09 |
| N-LINOLEOYLGLYCINE                            | Endocannabinoids         | FAAH inhibitor                                    | DMSO | 1   | 1.06 | 0.14 |
| TOLAZAMIDE                                    | Ion channel ligands      | Potassium channels                                | DMSO | 16  | 1.06 | 0.08 |
| H-89                                          | Kinase inhibitors        | PKA inhibitor                                     | DMSO | 10  | 1.06 | 0.14 |
| 9beta,11alpha-PROSTAGLANDIN F2                | Bioactive lipids         | Bioactive prostaglandin                           | DMSO | 1   | 1.06 | 0.33 |
| LEUKOTRIENE D4                                | Bioactive lipids         | CysLT receptor agonist                            | DMSO | 0.1 | 1.06 | 0.16 |
| lkarugamyin                                   | Inhibitors               | inhibits clathrin coated pit mediated endocytosis | DMSO | 10  | 1.06 | 0.14 |
| dibutyrylcyclic AMP                           | Activators               | PKA activator                                     | DMSO | 10  | 1.06 | 0.19 |
| ANANDAMIDE (18:2,n-6)                         | Endocannabinoids         | Cannabinoid receptor agonist                      | DMSO | 1   | 1.06 | 0.24 |
| B581                                          | Inhibitors               | farnesyltransferase inhibitor                     | DMSO | 11  | 1.06 | 0.14 |
| Boc-GVV-CHO                                   | Protease inhibitors      | Gamma secretase inhibitor                         | DMSO | 14  | 1.06 | 0.05 |
| cycloheximide-N-ethylethanoate                | Inhibitors               | FKBP12 inhibitor                                  | DMSO | 14  | 1.06 | 0.14 |
| PROSTAGLANDIN A1                              | Bioactive lipids         | Bioactive prostaglandin                           | DMSO | 1   | 1.06 | 0.14 |
| vinpocetine                                   | Inhibitors               | phosphodiesterase (PDE1) inhibitor                | DMSO | 14  | 1.05 | 0.11 |
| 13(S)-HODE                                    | Bioactive lipids         | Bioactive linoleic acid metabolite                | DMSO | 0.1 | 1.05 | 0.24 |
| 1-STEAROYL-2-ARACHIDONOYL-GLYCEROL            | Bioactive lipids         | PKC activator                                     | DMSO | 1   | 1.05 | 0.18 |
| 5-HYDROXYDECANOATE                            | Ion channel ligands      | Potassium channels                                | DMSO | 24  | 1.05 | 0.14 |
| MEAD ETHANOLAMIDE                             | Endocannabinoids         | Cannabinoid receptor agonist                      | DMSO | 1   | 1.05 | 0.22 |
| PROSTAGLANDIN E2                              | Bioactive lipids         | Prostaglandin EP receptor agonist                 | DMSO | 1   | 1.05 | 0.13 |
| cycloheximide                                 | Inhibitors               | protein synthesis inhibitor                       | DMSO | 18  | 1.05 | 0.11 |
| 15(S)-HETE                                    | Bioactive lipids         | Bioactive arachidonic acid metabolite             | DMSO | 0.1 | 1.05 | 0.16 |
| N-PHENYLANTHRANILIC (CL)                      | Ion channel ligands      | Misc. channels                                    | DMSO | 23  | 1.05 | 0.12 |
| PHOSPHATIDIC ACID, DIPALMITOYL                | Bioactive lipids         | Activates MAP kinase cascade                      | DMSO | 1   | 1.05 | 0.15 |
| VERATRIDINE                                   | Ion channel ligands      | Sodium channels                                   | DMSO | 7   | 1.05 | 0.17 |
| LINOLEIC ACID                                 | Bioactive lipids         | Polyunsaturated fatty acid                        | DMSO | 1   | 1.05 | 0.22 |
| U-50488                                       | Ion channel ligands      | Calcium channels                                  | DMSO | 11  | 1.05 | 0.16 |
| anisomycin                                    | Inhibitors               | MAP kinase activator                              | DMSO | 19  | 1.05 | 0.10 |
| LEUKOTRIENE E4                                | Bioactive lipids         | CysLT1 receptor agonist                           | DMSO | 0.1 | 1.05 | 0.09 |
| PAF C16                                       | Bioactive lipids         | PAF receptor agonist                              | DMSO | 1   | 1.04 | 0.08 |
| Rolipram                                      | Inhibitors               | phosphodiesterase (PDE4 ) inhibitor               | DMSO | 18  | 1.04 | 0.12 |
| Nimesulide                                    | Lipid biosynthesis       | Cox 2 inhibitor                                   | DMSO | 16  | 1.04 | 0.14 |
| 9alpha,11beta-PROSTAGLANDIN F2                | Bioactive lipids         | Bioactive prostaglandin                           | DMSO | 1   | 1.04 | 0.25 |
| K252A                                         | Kinase inhibitors        | Kinase inhibitor (Broad spectrum)                 | DMSO | 1   | 1.04 | 0.03 |
| TETRANDRINE                                   | Ion channel ligands      | Calcium channels                                  | DMSO | 8   | 1.04 | 0.20 |
| N-ACETYL-LEUKOTRIENE E4                       | Bioactive lipids         | Bioactive arachidonic acid metabolite             | DMSO | 0.1 | 1.04 | 0.12 |
| SQ-29548                                      | Bioactive lipids         | Thromboxane A2 antagonist                         | DMSO | 1   | 1.04 | 0.12 |
| capsacin(E)                                   | Ion channel ligands      | vanilloid receptor agonist                        | DMSO | 16  | 1.04 | 0.07 |
| BML-190                                       | Bioactive lipids         | Cannabinoid CB1 inverse agonist                   | DMSO | 1   | 1.04 | 0.25 |
| 2-ARACHIDONOYLGLYCEROL                        | Endocannabinoids         | Cannabinoid CB1 receptor agonist                  | DMSO | 1   | 1.04 | 0.14 |
| NICARDIPINE                                   | Ion channel ligands      | Calcium channels                                  | DMSO | 10  | 1.04 | 0.08 |
| N-ARACHIDONOYLGLYCINE                         | Endocannabinoids         | FAAH inhibitor                                    | DMSO | 1   | 1.03 | 0.10 |
| PROSTAGLANDIN J2                              | Bioactive lipids         | Bioactive prostaglandin                           | DMSO | 1   | 1.03 | 0.09 |

|                                       |                          |                                      |      |     |      |      |
|---------------------------------------|--------------------------|--------------------------------------|------|-----|------|------|
| zaprinast                             | Inhibitors               | phosphodiesterase (PDE1) inhibitor   | DMSO | 18  | 1.03 | 0.17 |
| GAMMA-LINOLENIC ACID (18:3 n-6)       | Bioactive lipids         | Polyunsaturated fatty acid           | DMSO | 1   | 1.03 | 0.17 |
| PALMITYLETHANOLAMIDE                  | Endocannabinoids         | Cannabinoid CB2 receptor agonist     | DMSO | 1   | 1.03 | 0.18 |
| calpeptin                             | Protease inhibitors      | Calpain inhibitor                    | DMSO | 14  | 1.03 | 0.11 |
| 13,14-DIHYDRO-PROSTAGLANDIN E1        | Bioactive lipids         | Bioactive prostaglandin              | DMSO | 1   | 1.03 | 0.26 |
| 5'-N-Ethylcarboxamidoadenosine (NECA) | CNS receptor ligands     | adenosine receptor agonist           | DMSO | 16  | 1.02 | 0.12 |
| 13-KETO-OCTADECADIENOIC ACID          | Bioactive lipids         | Bioactive linoleic acid metabolite   | DMSO | 0.1 | 1.02 | 0.20 |
| LINOLENIC ACID (18:3 n-3)             | Bioactive lipids         | Polyunsaturated fatty acid           | DMSO | 1   | 1.02 | 0.11 |
| C8 CERAMIDE                           | Bioactive lipids         | Stimulates Cer-activated PK          | DMSO | 1   | 1.02 | 0.23 |
| 1-HEXADECYL-2-ARACHIDONOYL-GLYCEROL   | Bioactive lipids         | DAG analog                           | DMSO | 1   | 1.02 | 0.19 |
| 17-OCTADECYNOIC ACID                  | Lipid biosynthesis       | Inhibits fatty acid omega oxidation  | DMSO | 1   | 1.02 | 0.17 |
| 1,25-DIHYDROXYVITAMIN D3              | Nuclear receptor ligands | Vitamin D receptor agonist           | DMSO | 1   | 1.02 | 0.14 |
| BADGE                                 | Nuclear receptor ligands | PPAR gamma antagonist                | DMSO | 15  | 1.02 | 0.10 |
| Z-prolyl-prolinal                     | Protease inhibitors      | Prolyl endopeptidase inhibitor       | DMSO | 15  | 1.02 | 0.09 |
| 17-PHENYL-TRINOR-PGE2                 | Bioactive lipids         | Prostaglandin EP1 receptor agonist   | DMSO | 1   | 1.02 | 0.24 |
| Arvanil                               | Ion channel ligands      | Vanilloid receptor agonist           | DMSO | 11  | 1.02 | 0.07 |
| ENANTIO-PAF C16                       | Bioactive lipids         | Negative control for PAF             | DMSO | 1   | 1.02 | 0.12 |
| METHOPRENE ACID                       | Nuclear receptor ligands | Retinoid RXR agonist                 | DMSO | 1   | 1.02 | 0.18 |
| acetyl (N)-s-farnesyl-L-cysteine      | Inhibitors               | farnesylation inhibitor              | DMSO | 14  | 1.01 | 0.11 |
| PROSTAGLANDIN I2 Na                   | Bioactive lipids         | Prostaglandin IP receptor agonist    | DMSO | 1   | 1.01 | 0.12 |
| D609                                  | Lipid biosynthesis       | PC-PLC inhibitor                     | DMSO | 19  | 1.01 | 0.24 |
| QUINIDINE                             | Ion channel ligands      | Sodium channels                      | DMSO | 15  | 1.01 | 0.12 |
| U-46619                               | Bioactive lipids         | Thromboxane TP receptor agonist      | DMSO | 1   | 1.01 | 0.15 |
| LINOLEAMIDE                           | Endocannabinoids         | Bioactive linoleic acid metabolite   | DMSO | 1   | 1.00 | 0.14 |
| Manoalide                             | Lipid biosynthesis       | Phospholipase A2 inhibitor           | DMSO | 12  | 1.00 | 0.11 |
| L-cis-DILTIAZEM                       | Ion channel ligands      | Calcium channels                     | DMSO | 11  | 1.00 | 0.15 |
| SPHINGOSINE                           | Bioactive lipids         | PKC inhibitor                        | DMSO | 1   | 1.00 | 0.13 |
| CinnGEL 2Me                           | Inhibitors               | PTP1B inhibitor                      | DMSO | 10  | 1.00 | 0.07 |
| LEUKOTOXIN B (12,13-EODE)             | Bioactive lipids         | Bioactive linoleic acid metabolite   | DMSO | 0.1 | 1.00 | 0.13 |
| deoxymannojirimycin(1)                | Inhibitors               | mannosidase inhibitor                | DMSO | 25  | 1.00 | 0.14 |
| Helenalin                             | Inhibitors               | NFKappaB inhibitor                   | DMSO | 19  | 1.00 | 0.19 |
| PROSTAGLANDIN B1                      | Bioactive lipids         | Bioactive prostaglandin              | DMSO | 1   | 1.00 | 0.14 |
| AMIODARONE                            | Ion channel ligands      | Calcium channels                     | DMSO | 8   | 1.00 | 0.15 |
| 6-FORMYLINDOLO [3,2-B] CARBAZOLE      | Bioactive lipids         | AHR agonist                          | DMSO | 1   | 1.00 | 0.33 |
| EICOSATRIENOIC ACID (20:3 n-3)        | Bioactive lipids         | Polyunsaturated fatty acid           | DMSO | 1   | 0.99 | 0.13 |
| 8-methoxymethyl-IBMX                  | Inhibitors               | phosphodiesterase (PDE1) inhibitor   | DMSO | 19  | 0.99 | 0.10 |
| DOCOSAPENTAENOIC ACID                 | Bioactive lipids         | Polyunsaturated fatty acid           | DMSO | 1   | 0.99 | 0.21 |
| WIN 55,212-2                          | CNS receptor ligands     | Cannabinoid CB1/CB2 receptor agonist | DMSO | 0.1 | 0.99 | 0.06 |
| Blebbistatin                          | Inhibitors               | Myosin II inhibitor                  | DMSO | 17  | 0.99 | 0.18 |
| LEUKOTRIENE C4                        | Bioactive lipids         | CysLT receptor agonist               | DMSO | 0.1 | 0.99 | 0.07 |
| Tosyl-Phe-CMK (TPCK)                  | Protease inhibitors      | Serine protease inhibitor            | DMSO | 14  | 0.99 | 0.13 |
| FLUPROSTENOL                          | Bioactive lipids         | Prostaglandin FP receptor agonist    | DMSO | 1   | 0.98 | 0.13 |
| EICOSA-5,8-DIENOIC ACID (20:2 n-12)   | Bioactive lipids         | Polyunsaturated fatty acid           | DMSO | 1   | 0.98 | 0.15 |
| BW-B 70C                              | Lipid biosynthesis       | 5 lipoxygenase inhibitor             | DMSO | 16  | 0.98 | 0.15 |
| ML7                                   | Kinase inhibitors        | kinase inhibitor                     | DMSO | 11  | 0.98 | 0.13 |
| LY-171883                             | Bioactive lipids         | Leukotriene D4 receptor antagonist   | DMSO | 1   | 0.98 | 0.17 |
| C-PAF                                 | Bioactive lipids         | PAF receptor agonist                 | DMSO | 1   | 0.98 | 0.19 |
| PROSTAGLANDIN B2                      | Bioactive lipids         | Bioactive prostaglandin              | DMSO | 1   | 0.98 | 0.13 |
| REV-5901                              | Lipid biosynthesis       | 5-Lipoxygenase inhibitor             | DMSO | 1   | 0.97 | 0.15 |
| MAPP, D-erythro                       | Lipid biosynthesis       | Ceramidase inhibitor                 | DMSO | 1   | 0.97 | 0.11 |
| MINOXIDIL                             | Ion channel ligands      | Potassium channels                   | DMSO | 24  | 0.97 | 0.04 |
| (R)-METHANANDAMIDE                    | CNS receptor ligands     | Cannabinoid CB1 receptor agonist     | DMSO | 1   | 0.97 | 0.18 |
| DOCOSAHEXAENOIC ACID (22:6 n-3)       | Bioactive lipids         | Polyunsaturated fatty acid           | DMSO | 1   | 0.97 | 0.21 |
| brefeldin A                           | Inhibitors               | ARF GEF inhibitor                    | DMSO | 18  | 0.97 | 0.09 |
| MDL-28170                             | Protease inhibitors      | Calpain inhibitor                    | DMSO | 13  | 0.97 | 0.06 |
| dexamethasone                         | Nuclear receptor ligands | corticosteroid                       | DMSO | 13  | 0.97 | 0.11 |
| EICOSADIENOIC ACID (20:2 n-6)         | Bioactive lipids         | Polyunsaturated fatty acid           | DMSO | 1   | 0.96 | 0.11 |
| deoxynorjirimycin(1)                  | Inhibitors               | glucosidase inhibitor                | DMSO | 25  | 0.96 | 0.11 |
| LOPERAMIDE                            | Ion channel ligands      | Calcium channels                     | DMSO | 10  | 0.96 | 0.10 |
| U-75302                               | Bioactive lipids         | Leukotriene B4 receptor antagonist   | DMSO | 0.1 | 0.96 | 0.09 |

|                                  |                          |                                             |      |     |      |      |
|----------------------------------|--------------------------|---------------------------------------------|------|-----|------|------|
| FIPRONIL                         | Ion channel ligands      | Misc. channels                              | DMSO | 11  | 0.96 | 0.10 |
| GINGEROL                         | Ion channel ligands      | Intracellular calcium                       | DMSO | 17  | 0.96 | 0.07 |
| 9-CIS RETINOIC ACID              | Nuclear receptor ligands | Retinoid RXR agonist                        | DMSO | 1   | 0.96 | 0.22 |
| LIPOXIN A4                       | Bioactive lipids         |                                             | DMSO | 0.1 | 0.95 | 0.15 |
| DILTIAZEM                        | Ion channel ligands      | Calcium channels                            | DMSO | 11  | 0.95 | 0.17 |
| FLUFENAMIC ACID                  | Ion channel ligands      | Potassium channels                          | DMSO | 18  | 0.95 | 0.13 |
| cytochalasin B                   | Inhibitors               | F actin capper                              | DMSO | 10  | 0.95 | 0.11 |
| AG1478                           | Kinase inhibitors        | Tyrosine kinase inhibitor. Broad spectrum   | DMSO | 14  | 0.95 | 0.12 |
| FLUNARIZINE                      | Ion channel ligands      | Calcium channels                            | DMSO | 10  | 0.95 | 0.16 |
| S-FARNESYL-L-CYSTEINE ME         | Bioactive lipids         | MDR ATPase activator                        | DMSO | 1   | 0.95 | 0.17 |
| etoposide                        | Inhibitors               | topoisomerase II inhibitor                  | DMSO | 8   | 0.95 | 0.11 |
| DL-PPMP                          | Lipid biosynthesis       | Glucosylceramide synthase inhibitor         | DMSO | 1   | 0.95 | 0.12 |
| E-4031                           | Ion channel ligands      | Potassium channels                          | DMSO | 10  | 0.95 | 0.14 |
| C2 DIHYDROCERAMIDE               | Bioactive lipids         | Negative control for C2 ceramide            | DMSO | 1   | 0.94 | 0.20 |
| PROSTAGLANDIN A2                 | Bioactive lipids         | Bioactive prostaglandin                     | DMSO | 1   | 0.94 | 0.18 |
| Ro 20-1724                       | Inhibitors               | phosphodiesterase (PDE4 ) inhibitor         | DMSO | 18  | 0.94 | 0.12 |
| C8 CERAMINE                      | Bioactive lipids         | Ceramide analog. Apoptosis inducer          | DMSO | 1   | 0.94 | 0.14 |
| LEUKOTRIENE B4                   | Bioactive lipids         | Leukotriene B4 receptor agonist             | DMSO | 0.1 | 0.94 | 0.15 |
| HA14-1                           | Inhibitors               | Bcl-2 ligand induces apoptosis              | DMSO | 12  | 0.93 | 0.13 |
| LYSO-PAF C16                     | Bioactive lipids         | Inactive PAF metabolite                     | DMSO | 1   | 0.93 | 0.05 |
| EICOSAPENTAENOIC ACID (20:5 n-3) | Bioactive lipids         | Polyunsaturated fatty acid                  | DMSO | 1   | 0.93 | 0.15 |
| 1-STEAROYL- 2-LINOLEOYL-GLYCEROL | Bioactive lipids         | PKC activator                               | DMSO | 1   | 0.93 | 0.24 |
| LY-83583                         | Inhibitors               | Inhibits NO-activation of guanylate cyclase | DMSO | 20  | 0.92 | 0.09 |
| WY-14643                         | Nuclear receptor ligands | PPAR alpha agonist                          | DMSO | 0.1 | 0.92 | 0.10 |
| DL-DIHYDROSPHINGOSINE            | Lipid biosynthesis       | Sphingosine kinase inhibitor                | DMSO | 1   | 0.92 | 0.18 |
| METHOXY VERAPAMIL                | Ion channel ligands      | Calcium channels                            | DMSO | 10  | 0.92 | 0.15 |
| decoyinine                       | Inhibitors               | lowers GTP levels                           | DMSO | 18  | 0.92 | 0.05 |
| MY-5445                          | Inhibitors               | phosphodiesterase (PDE5) inhibitor          | DMSO | 15  | 0.92 | 0.11 |
| alamethicin                      | Inhibitors               | monovalent cation ionophore                 | DMSO | 3   | 0.92 | 0.16 |
| DICHLORO BENZAMIL                | Ion channel ligands      | Calcium channels                            | DMSO | 12  | 0.91 | 0.12 |
| Bromo-cAMP [8-Bromo-cAMP]        | Activators               | PKA activator                               | DMSO | 12  | 0.91 | 0.05 |
| Siguazodan                       | Inhibitors               | phosphodiesterase (PDE3) inhibitor          | DMSO | 18  | 0.91 | 0.15 |
| TRIM                             | Inhibitors               | bNOS/iNOS inhibitor                         | DMSO | 24  | 0.90 | 0.08 |
| Delta 12-PROSTAGLANDIN J2        | Bioactive lipids         | Bioactive prostaglandin                     | DMSO | 1   | 0.90 | 0.08 |
| GW-9662                          | Nuclear receptor ligands | PPAR gamma antagonist                       | DMSO | 18  | 0.90 | 0.11 |
| DL-PDMP                          | Lipid biosynthesis       | Glucosylceramide synthase inhibitor         | DMSO | 1   | 0.90 | 0.15 |
| YC-1                             | Activators               | GC stimulator / Hif-1 alpha inhibitor       | DMSO | 16  | 0.89 | 0.07 |
| DOCOSATRIENOIC ACID (22:3 n-3)   | Bioactive lipids         | Polyunsaturated fatty acid                  | DMSO | 1   | 0.89 | 0.19 |
| 2,5-diterbutylhydroquinone       | Ion channel ligands      | ER Ca++ ATPase inhibitor                    | DMSO | 22  | 0.89 | 0.09 |
| AM-580                           | Nuclear receptor ligands | Retinoid RAR agonist                        | DMSO | 1   | 0.89 | 0.21 |
| actinomycin D                    | Inhibitors               | transcription inhibitor                     | DMSO | 4   | 0.89 | 0.06 |
| FLUSPIRILINE                     | Ion channel ligands      | Potassium channels                          | DMSO | 11  | 0.88 | 0.10 |
| FLECAINIDE                       | Ion channel ligands      | Sodium channels                             | DMSO | 12  | 0.88 | 0.08 |
| chelerythrine                    | Kinase inhibitors        | PKC inhibitor                               | DMSO | 13  | 0.88 | 0.15 |
| 1,2-DIOCTANOYL-SN-GLYCEROL       | Bioactive lipids         | Activates PKC                               | DMSO | 1   | 0.87 | 0.09 |
| PINACIDIL                        | Ion channel ligands      | Potassium channels                          | DMSO | 20  | 0.87 | 0.07 |
| PAXILLINE                        | Ion channel ligands      | Potassium channels                          | DMSO | 11  | 0.87 | 0.09 |
| DANTROLENE                       | Ion channel ligands      | Intracellular calcium                       | DMSO | 16  | 0.87 | 0.12 |
| AMANTIDINE                       | Ion channel ligands      | Misc. channels                              | DMSO | 33  | 0.87 | 0.03 |
| LY-294002                        | Lipid biosynthesis       | PI-3-Kinase inhibitor                       | DMSO | 16  | 0.86 | 0.08 |
| DIINDOLYLMETHANE                 | Nuclear receptor ligands | AHR agonist                                 | DMSO | 1   | 0.86 | 0.08 |
| Lycorine                         | Inhibitors               | inhibits TNFalpha production                | DMSO | 15  | 0.86 | 0.06 |
| DIHOMO-GAMMA-LINOLENIC ACID      | Bioactive lipids         | Polyunsaturated fatty acid                  | DMSO | 1   | 0.86 | 0.10 |
| Parthenolide                     | Inhibitors               | IkappaB kinase inhibitor                    | DMSO | 20  | 0.86 | 0.24 |
| AG-490                           | Kinase inhibitors        | JAK2 inhibitor                              | DMSO | 17  | 0.85 | 0.07 |
| BEPRIDIL                         | Ion channel ligands      | Calcium channels                            | DMSO | 14  | 0.85 | 0.08 |
| Latrunculin B                    | Inhibitors               | Actin inhibitor                             | DMSO | 13  | 0.84 | 0.25 |
| AMILORIDE                        | Ion channel ligands      | Calcium channels                            | DMSO | 19  | 0.83 | 0.11 |
| NITRENDIPINE                     | Ion channel ligands      | Calcium channels                            | DMSO | 14  | 0.83 | 0.12 |
| Milrinone                        | Inhibitors               | phosphodiesterase (PDE3) inhibitor          | DMSO | 24  | 0.83 | 0.09 |

|                            |                          |                                                                  |      |    |      |      |
|----------------------------|--------------------------|------------------------------------------------------------------|------|----|------|------|
| 13-CIS RETINOIC ACID       | Nuclear receptor ligands | Retinoid receptor ligand                                         | DMSO | 1  | 0.82 | 0.16 |
| Trequinsin                 | Inhibitors               | phosphodiesterase (PDE3) inhibitor                               | DMSO | 11 | 0.82 | 0.04 |
| Ac-Leu-Leu-Nle-CHO         | Protease inhibitors      | Calpain inhibitor                                                | DMSO | 13 | 0.82 | 0.10 |
| AM 92016                   | Ion channel ligands      | Potassium channels                                               | DMSO | 10 | 0.82 | 0.15 |
| ESTRADIOL                  | Nuclear receptor ligands | estrogen                                                         | DMSO | 18 | 0.81 | 0.07 |
| DIHYDROSPHINGOSINE         | Bioactive lipids         | Apoptosis inducer                                                | DMSO | 1  | 0.81 | 0.07 |
| ZM226600                   | Ion channel ligands      | Potassium channels                                               | DMSO | 13 | 0.81 | 0.08 |
| MBCQ                       | Inhibitors               | phosphodiesterase (PDE5) inhibitor                               | DMSO | 16 | 0.81 | 0.06 |
| CYCLOPIAZONIC ACID         | Ion channel ligands      | Intracellular calcium                                            | DMSO | 15 | 0.80 | 0.17 |
| NS-1619                    | Ion channel ligands      | Potassium channels                                               | DMSO | 14 | 0.77 | 0.11 |
| cantharidin                | Inhibitors               | PP2A inhibitor                                                   | DMSO | 25 | 0.76 | 0.12 |
| NIMODIPINE                 | Ion channel ligands      | Calcium channels                                                 | DMSO | 12 | 0.76 | 0.09 |
| PROPAFENONE                | Ion channel ligands      | Potassium channels                                               | DMSO | 15 | 0.76 | 0.02 |
| KN-62                      | Kinase inhibitors        | CaM kinase II inhibitor                                          | DMSO | 7  | 0.76 | 0.07 |
| RETINOIC ACID, ALL TRANS   | Nuclear receptor ligands | Retinoid RAR agonist                                             | DMSO | 1  | 0.76 | 0.12 |
| zardaverine                | Inhibitors               | phosphodiesterase (PDE1/2) inhibitor                             | DMSO | 19 | 0.75 | 0.12 |
| GLIPIZIDE                  | Ion channel ligands      | Potassium channels                                               | DMSO | 11 | 0.75 | 0.15 |
| FPL-64176                  | Ion channel ligands      | Calcium channels                                                 | DMSO | 14 | 0.75 | 0.09 |
| TOLBUTAMIDE                | Ion channel ligands      | Potassium channels                                               | DMSO | 18 | 0.74 | 0.11 |
| PAF C18:1                  | Bioactive lipids         | PAF receptor agonist                                             | DMSO | 1  | 0.73 | 0.12 |
| Nigericin                  | Inhibitors               | induces intracellular acidification                              | DMSO | 7  | 0.73 | 0.18 |
| forskolin                  | Activators               | Adenylate cyclase activator                                      | DMSO | 12 | 0.71 | 0.06 |
| TTNPB                      | Nuclear receptor ligands | Retinoid RAR agonist                                             | DMSO | 1  | 0.69 | 0.04 |
| diphenyleiodonium Cl       | Inhibitors               | flavoprotein inhibitor                                           | DMSO | 16 | 0.64 | 0.04 |
| EHNA HCl                   | Inhibitors               | Phosphodiesterase (PDE2) inhibitor/adenosine deaminase inhibitor | DMSO | 16 | 0.64 | 0.06 |
| doxorubicin                | Inhibitors               | topoisomerase II inhibitor, induces apoptosis                    | DMSO | 9  | 0.63 | 0.07 |
| Go6976                     | Kinase inhibitors        | PKC inhibitor                                                    | DMSO | 13 | 0.61 | 0.12 |
| 2-methoxyantimycin A3      | Inhibitors               | Bcl-2/Bcl-XL ligand induces apoptosis                            | DMSO | 9  | 0.61 | 0.03 |
| GLYBURIDE                  | Ion channel ligands      | Potassium channels                                               | DMSO | 10 | 0.61 | 0.15 |
| calyculin A                | Inhibitors               | PP1, PP2A inhibitor                                              | DMSO | 0  | 0.59 | 0.09 |
| beta-lapachone             | Inhibitors               | topoisomerase 1 inhibitor                                        | DMSO | 21 | 0.58 | 0.10 |
| NapSul-Ile-Trp-CHO         | Protease inhibitors      | Cathepsin L inhibitor                                            | DMSO | 10 | 0.57 | 0.04 |
| capsazepine                | Ion channel ligands      | vanilloid receptor antagonist                                    | DMSO | 13 | 0.56 | 0.03 |
| A-3                        | Kinase inhibitors        | kinase inhibitor                                                 | DMSO | 16 | 0.56 | 0.07 |
| 17-Allylamino-geldanamycin | Inhibitors               | HSP-90 inhibitor                                                 | DMSO | 9  | 0.50 | 0.08 |
| geldanamycin               | Inhibitors               | HSP90 inhibitor                                                  | DMSO | 9  | 0.48 | 0.05 |
| genistein                  | Kinase inhibitors        | Tyrosine kinase inhibitor                                        | DMSO | 19 | 0.43 | 0.03 |
| DIAZOXIDE                  | Ion channel ligands      | Potassium channels                                               | DMSO | 22 | 0.40 | 0.05 |
| mitomycin C                | Inhibitors               | cross links DNA                                                  | DMSO | 15 | 0.28 | 0.04 |
| 10-hydroxycamptothecin     | Inhibitors               | topoisomerase 1 inhibitor                                        | DMSO | 14 | 0.21 | 0.01 |
| camptothecin               | Inhibitors               | Topoisomerase 1 inhibitor                                        | DMSO | 14 | 0.18 | 0.01 |

## Supplementary Table S2 Primer Sequence used for RT-PCR

| PRIMER     | SEQUENCE                 |
|------------|--------------------------|
| Serca1-Fw  | ATCTTCAAGCTCCGGGGCCCT    |
| Serca1-Rv  | CAGCTTTGGCTGAAGATGCA     |
| m-Titin-Fw | GTGTGAGTCGCTCCAGAAACG    |
| m-Titin-Rv | CCACCACAGGACCATGTTATTTTC |
| Gapdh-Fw   | TGCTGAGTATGTCGTGGAGTCTA  |
| Gapdh-Rv   | AGTGGGAGTTGCTGTTGAAGTCG  |
| H-Ras-Fw   | AAAGTGCCTCACTGGTTGCT     |
| H-Ras-Rv   | ACTTCACCCAATTCCACTCG     |
| K-Ras-Fw   | ACATTAACCTCCCAGCCGTG     |
| K-Ras-Rv   | TGGCCAAGGATTGAGGACAC     |
| N-Ras-Fw   | AGTGTGTACAATGGAGGCGG     |
| N-Ras-Rv   | GACGGCACGCATGGAAATAC     |
